# Supplementary material for: The potential prognostic values of the ADAMTS-like protein family: an integrative pan-cancer analysis
Source: PubMed Central journal article supplement — Ann Transl Med. 2021 Oct;9(20):1562. doi: 10.21037/atm-21-4946 (PMC8576672; doi:10.21037/atm-21-4946), 2021-10
Supplement: atm-09-20-1562-supplementary.pdf [file atm-09-20-1562-supplementary.pdf]

**Table S1** Correlations between the expression of each ADAMTSLs gene across all 33 cancer types tested with Pearson correlation tests

| Variable   | ADAMTSL1 | ADAMTSL2 | ADAMTSL3 | ADAMTSL4 | ADAMTSL5 | THSD4    | PAPLN    |
|------------|----------|----------|----------|----------|----------|----------|----------|
| ADAMTSL1_r | 1        | 0.12     | 0.18     | 0.01     | -0.08    | 0.22     | -0.04    |
| ADAMTSL1_p | -        | 4.0e-32  | 7.2e-73  | 0.16     | 2.2e-17  | 2.6e-113 | 2.5e-05  |
| ADAMTSL2_r | 0.12     | 1        | 0.23     | -0.07    | -0.14    | 0.02     | 0.16     |
| ADAMTSL2_p | 4.0e-32  | -        | 1.1e-125 | 3.3e-11  | 6.7e-45  | 0.028    | 1.2e-62  |
| ADAMTSL3_r | 0.18     | 0.23     | 1        | 0.16     | -0.14    | 0.19     | 0.32     |
| ADAMTSL3_p | 7.2e-73  | 1.1e-125 | -        | 2.2e-59  | 1.04e-45 | 1.6e-83  | 2.9e-245 |
| ADAMTSL4_r | 0.01     | -0.07    | 0.16     | 1        | 0.25     | -0.08    | 0.21     |
| ADAMTSL4_p | 0.16     | 3.3e-11  | 2.2e-59  | -        | 1.6e-143 | 2.3e-17  | 1.6e-105 |
| ADAMTSL5_r | -0.08    | -0.14    | -0.14    | 0.25     | 1        | 0.01     | -0.02    |
| ADAMTSL5_p | 2.2e-17  | 6.7e-45  | 1.04e-45 | 1.6e-143 | -        | 0.58     | 0.037    |
| THSD4_r    | 0.22     | 0.02     | 0.19     | -0.08    | 0.01     | 1        | 0.03     |
| THSD4_p    | 2.6e-113 | 0.028    | 1.6e-83  | 2.3e-17  | 0.58     | -        | 0.0049   |
| PAPLN_r    | -0.04    | 0.16     | 0.32     | 0.21     | -0.02    | 0.03     | 1        |
| PAPLN_p    | 2.5e-05  | 1.2e-62  | 2.9e-245 | 1.6e-105 | 0.037    | 0.0049   | -        |

r, correlation coefficient; P, P values for the correlation test. ADAMTSLs: A disintegrin-like and metalloproteinase domain with thrombospondin type 1 motifs (ADAMTS)-like proteins.

**Table S2** Correlations between ADAMTSLs and tumor stemness scores (RNAss and DNAss) and tumor infiltration scores (stromal scores, immune scores and estimate scores) across all 33 cancer types tested with Pearson correlation test

| Variable          | ADAMTSL1 | ADAMTSL2 | ADAMTSL3 | ADAMTSL4 | ADAMTSL5 | THSD4  | PAPLN  |
|-------------------|----------|----------|----------|----------|----------|--------|--------|
| RNAss_r           | -0.308   | -0.429   | -0.443   | -0.176   | 0.127    | -0.244 | -0.402 |
| RNAss_p           | <0.001   | <0.001   | <0.001   | <0.001   | <0.001   | <0.001 | <0.001 |
| DNAss_r           | -0.070   | -0.121   | -0.074   | 0.091    | 0.181    | -0.165 | -0.228 |
| DNAss_p           | <0.001   | <0.001   | <0.001   | <0.001   | <0.001   | <0.001 | <0.001 |
| Stromal scores_r  | 0.294    | 0.257    | 0.313    | 0.287    | -0.002   | 0.100  | 0.242  |
| Stromal score_p   | <0.001   | <0.001   | <0.001   | <0.001   | 0.838    | <0.001 | <0.001 |
| Immune scores_r   | -0.011   | -0.039   | 0.089    | 0.359    | 0.002    | -0.206 | 0.279  |
| Immune scores_p   | 0.245    | <0.001   | <0.001   | <0.001   | 0.802    | <0.001 | <0.001 |
| Estimate scores_r | 0.141    | 0.106    | 0.213    | 0.365    | <0.001   | -0.076 | 0.293  |
| Estimate scores_p | <0.001   | <0.001   | <0.001   | <0.001   | 0.960    | <0.001 | <0.001 |

r, correlation coefficient; P, P values for the correlation test. ADAMTSLs, A disintegrin-like and metalloproteinase domain with thrombospondin type 1 motifs (ADAMTS)-like proteins; RNAss, RNA stemness; DNAss, DNA stemness.

**Table S3** The list of significantly correlated genes and drugs with  $|r|>0.4$  and  $P<0.01$

| Gene            | Drug name              | Correlation coefficient | P value  |
|-----------------|------------------------|-------------------------|----------|
| <i>ADAMTSL1</i> | Simvastatin            | 0.6338                  | 5.45E-08 |
| <i>ADAMTSL1</i> | Procarbazine           | 0.6018                  | 3.67E-07 |
| <i>ADAMTSL1</i> | Olaparib               | 0.5670                  | 2.32E-06 |
| <i>ADAMTSL1</i> | Staurosporine          | 0.5299                  | 1.34E-05 |
| <i>ADAMTSL1</i> | By-Product of CUDC-305 | -0.4715                 | 0.00014  |
| <i>ADAMTSL1</i> | Testolactone           | 0.4542                  | 0.00027  |
| <i>ADAMTSL1</i> | Wortmannin             | 0.4036                  | 0.0014   |
| <i>ADAMTSL2</i> | Alectinib              | 0.4914                  | 6.71E-05 |
| <i>ADAMTSL2</i> | Etoposide              | 0.4194                  | 0.00085  |
| <i>ADAMTSL2</i> | Pipobroman             | 0.4023                  | 0.0014   |
| <i>ADAMTSL3</i> | AZD-9291               | 0.6721                  | 4.10E-09 |
| <i>ADAMTSL3</i> | Ibrutinib              | 0.6497                  | 1.95E-08 |
| <i>ADAMTSL3</i> | Afatinib               | 0.5974                  | 4.68E-07 |
| <i>ADAMTSL3</i> | Lapatinib              | 0.5684                  | 2.17E-06 |
| <i>ADAMTSL3</i> | Erlotinib              | 0.5454                  | 6.60E-06 |
| <i>ADAMTSL3</i> | Gefitinib              | 0.4557                  | 0.00025  |
| <i>ADAMTSL4</i> | Eribulin mesilate      | -0.4089                 | 0.0012   |
| <i>ADAMTSL4</i> | Homoharringtonine      | -0.4037                 | 0.0014   |
| <i>ADAMTSL5</i> | Palbociclib            | -0.4521                 | 0.00029  |
| <i>ADAMTSL5</i> | Perifosine             | -0.4314                 | 0.00058  |
| <i>THSD4</i>    | Carmustine             | -0.4682                 | 0.00016  |
| <i>THSD4</i>    | Vincristine            | -0.4510                 | 0.00030  |
| <i>THSD4</i>    | Lomustine              | -0.4096                 | 0.0012   |
| <i>THSD4</i>    | Curcumin               | -0.4072                 | 0.0012   |
| <i>THSD4</i>    | Triciribine phosphate  | 0.4051                  | 0.0013   |
| <i>PAPLN</i>    | AZD-9291               | 0.4517                  | 0.00029  |
| <i>PAPLN</i>    | Erlotinib              | 0.4097                  | 0.0011   |

r, correlation coefficient; P, P values for the correlation test.

**Table S4** Correlations between ADAMTSLs and immune blockade molecules across all 33 cancer types tested with Pearson correlation tests

| Variable   | ADAMTSL1 | ADAMTSL2 | ADAMTSL3 | ADAMTSL4 | ADAMTSL5 | THSD4    | PAPLN    |
|------------|----------|----------|----------|----------|----------|----------|----------|
| PDCD1LG2_r | 0.24     | 0.02     | 0.17     | 0.36     | 0.051    | -0.0058  | 0.27     |
| PDCD1LG2_p | <2.2e-16 | 0.04     | <2.2e-16 | <2.2e-16 | 7e-08    | 0.54     | <2.2e-16 |
| PDCD1_r    | 0.026    | -0.02    | 0.048    | 0.27     | 0.096    | -0.091   | 0.27     |
| PDCD1_p    | 0.0061   | 0.035    | 4.9e-07  | <2.2e-16 | <2.2e-16 | <2.2e-16 | <2.2e-16 |
| CTLA4_r    | 0.056    | -0.08    | -0.018   | 0.28     | 0.23     | -0.091   | 0.18     |
| CTLA4_p    | 3.1e-09  | <2.2e-16 | 0.058    | <2.2e-16 | <2.2e-16 | <2.2e-16 | <2.2e-16 |
| LAG3_r     | 0.053    | -0.13    | -0.02    | 0.22     | 0.087    | -0.099   | 0.091    |
| LAG3_p     | 2.6e-08  | <2.2e-16 | 0.039    | <2.2e-16 | <2.2e-16 | <2.2e-16 | <2.2e-16 |
| HAVCR2_r   | 0.12     | 0.12     | 0.16     | 0.25     | -0.12    | -0.12    | 0.34     |
| HAVCR2_p   | <2.2e-16 |
| CD274_r    | 0.01     | 0.017    | 0.089    | 0.25     | 0.088    | -0.019   | 0.3      |
| CD274_p    | 0.28     | 0.072    | <2.2e-16 | <2.2e-16 | <2.2e-16 | 0.044    | <2.2e-16 |

r, correlation coefficient; P, P values for the correlation test. ADAMTSLs, A disintegrin-like and metalloproteinase domain with thrombospondin type 1 motifs (ADAMTS)-like proteins.

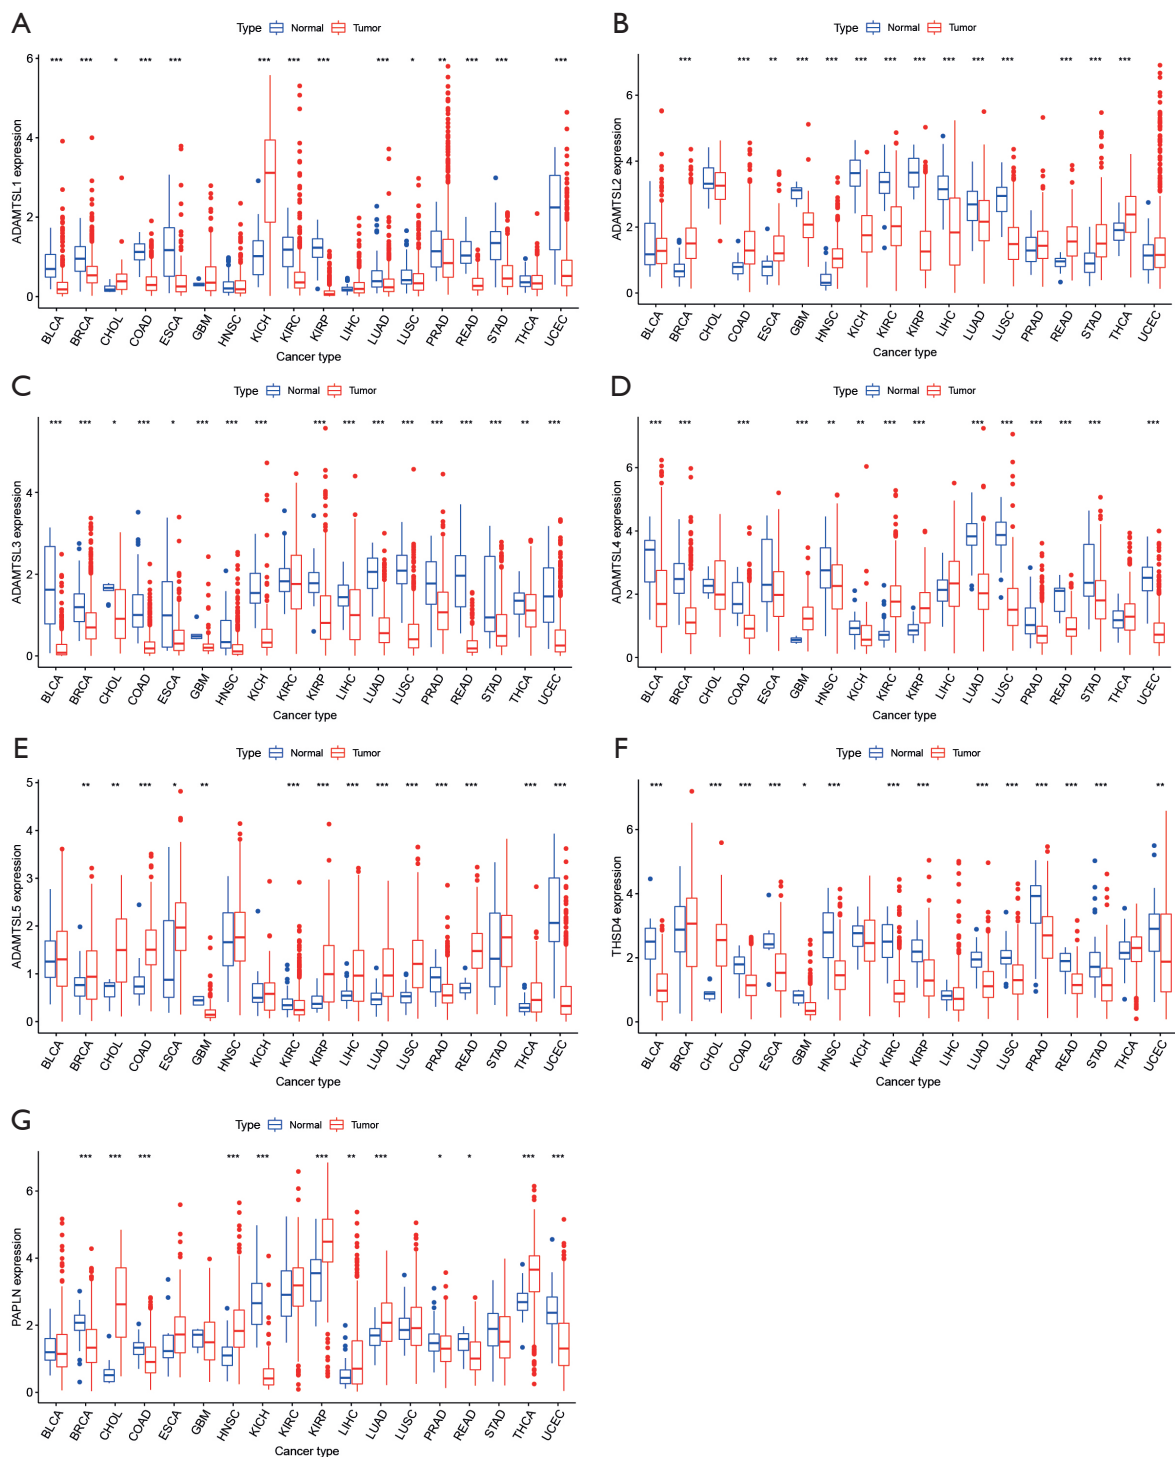

**Figure 1** The mRNA expression levels of ADAMTSL genes in each cancer type between tumor and normal tissues. (A) ADAMTSL1, (B) ADAMTSL2, (C) ADAMTSL3, (D) ADAMTSL4, (E) [ADAMTSL5, (F) THSD4, (G) PAPLN. \*,  $P < 0.05$ ; \*\*,  $P < 0.01$ ; \*\*\*,  $P < 0.001$ . ADAMTSLs, A disintegrin-like and metalloproteinase domain with thrombospondin type 1 motifs (ADAMTS)-like proteins; THSD4, thrombospondin type 1 domain containing 4; PAPLN, papilin.

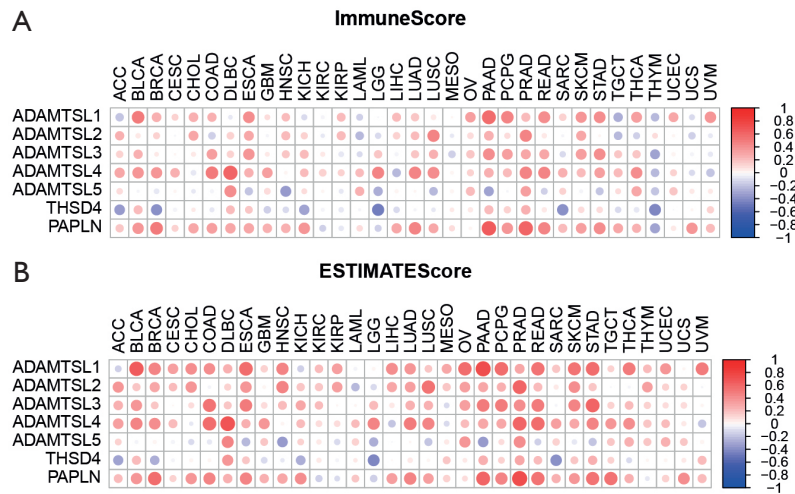

Figure S2 Correlation matrix plots to show the association between the expression of ADAMTSLs and immune score and estimate scores based on ESTIMATE algorithm. (A) Immune score, (B) estimate score. Spearman correlation was used for testing. The size of the dots represents the absolute value of the correlation coefficients. The bigger the size is, the higher the correlation is (higher absolute correlation coefficient). ADAMTSLs, A disintegrin-like and metalloproteinase domain with thrombospondin type 1 motifs (ADAMTS)-like proteins; ESTIMATE, estimation of stromal and immune cells in malignant tumor tissues using expression data.

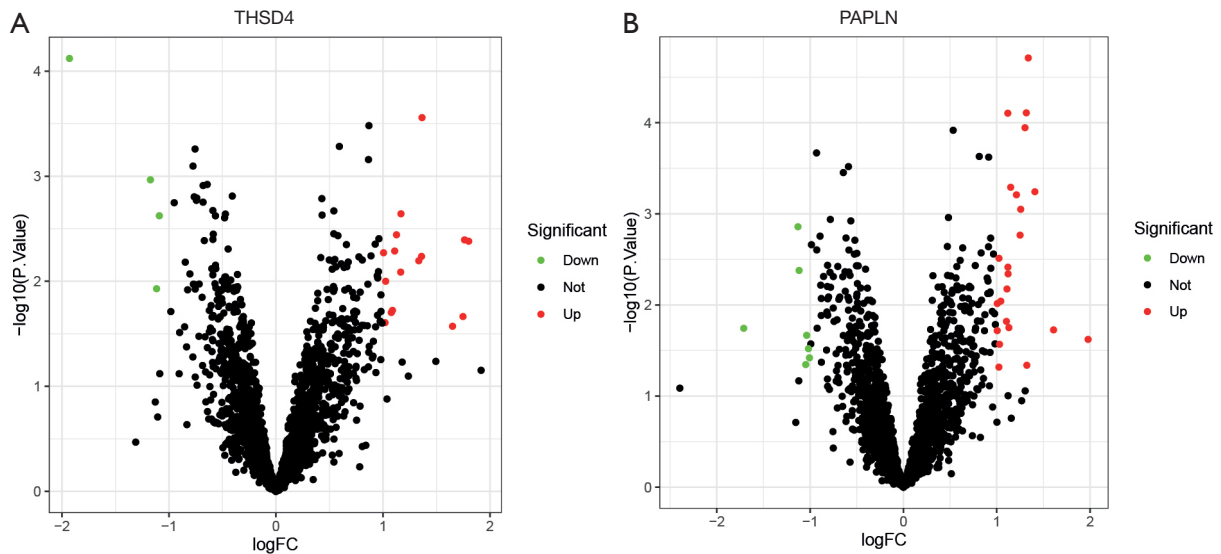

Figure S3 Volcano map showing the THSD4 or PAPLN-related proteins by proteomic analysis of 18 LUAD patients. (A) THSD4, (B) PAPLN. Red dots represent genes that were significantly upregulated; green dots represent genes that were significantly downregulated; black dots represent genes for which no significant differences were observed. LUAD, lung adenocarcinoma; THSD4, thrombospondin type 1 domain containing 4; PAPLN, Papilin.
